# Supplementary material for: The Manifold Bioactivity and Immunoreactivity of Microbial Proteins of Cow and Human Mature Milk in Late Lactation
Source: MDPI journal article supplement (doi:10.3390/ani12192605), 2022-09-28
Supplement: s1 [file s1]

## Supplementary data

### Human sere description:

Human sera were collected from 6 polyallergic patients 6–17 years (average 8.4 years). Total serum IgE, estimated with ImmunoCAP (Phadia UniCAP system, Uppsala, Sweden), ranged 107-1777 kU/L. The presence of specific IgE antibodies against food antigens (including: anti cow's milk antigens: f76: alpha-lactalbumin, f77: beta-lactoglobulin, f78: casein; anti hens egg: f75: hens egg yolk; f51-soybean; f49: apple); animal dander (against cat: e1 and dog: e5); against pollen: birch: t3; meadow grass: g8; mugwort: w6. Allergy to food, pollen as well as animal dander) was confirmed with immunoblot (Allergy Profile Pediatric test, DP 3712–1601E; EUROIMMUN, Wroclaw, Poland). Total serum IgG, estimated with IgG (Total) Human ELISA Kit (BMS2091; Thermo Fisher, Life Technologies, Poland), ranged 6.8-14.5 mg/mL. No specific antibodies in control 6 sera and total IgE < 16 kU/mL, total IgG < 4 mg/mL were confirmed. The detailed characteristics of serum was included in the authors' publication REF: Ogrodowczyk AM, Zakrzewska M, Romaszko E, Wróblewska B. Gestational Dysfunction-Driven Diets and Probiotic Supplementation Correlate with the Profile of Allergen-Specific Antibodies in the Serum of Allergy Sufferers. *Nutrients*. 2020 Aug 9;12(8):2381. doi: 10.3390/nu12082381. PMID: 32784846; PMCID: PMC7468854.

**Table S1.** Dairy proteins identified by LC-MS/MS analysis in milk samples digests

| Protein Name                                     | Accession <sup>a</sup> | Score <sup>b</sup> | Mass <sup>c</sup> | Matches <sup>d</sup> | emPAI <sup>e</sup> | Protein sequence coverage <sup>f</sup> | Host organism       |
|--------------------------------------------------|------------------------|--------------------|-------------------|----------------------|--------------------|----------------------------------------|---------------------|
| <b>Cow's milk proteins</b>                       |                        |                    |                   |                      |                    |                                        |                     |
| Beta-lactoglobulin                               | P02754                 | 9221               | 19,870            | 420                  | 186.95             | 43                                     | <i>Bos taurus</i>   |
| Alpha-S1-casein                                  | P02662                 | 7356               | 24,513            | 994                  | 195.07             | 33                                     | <i>Bos taurus</i>   |
| Beta-casein                                      | P02666                 | 828                | 25,137            | 203                  | 7.72               | 51                                     | <i>Bos taurus</i>   |
| Alpha-lactalbumin                                | P00711                 | 165                | 16,236            | 7                    | 2.59               | 26                                     | <i>Bos taurus</i>   |
| Xanthine dehydrogenase/oxidase                   | F1MUT3                 | 100                | 148,417           | 11                   | 0.09               | 4                                      | <i>Bos taurus</i>   |
| Immunoglobulin J chain                           | Q3SYR8                 | 81                 | 18,260            | 2                    | 0.25               | 9                                      | <i>Bos taurus</i>   |
| Complement C3                                    | Q2UVX4                 | 80                 | 188,377           | 4                    | 0.05               | 3                                      | <i>Bos taurus</i>   |
| Kappa-casein                                     | A0A140T8A9             | 79                 | 21,316            | 10                   | 0.22               | 22                                     | <i>Bos taurus</i>   |
| Glycosylation-dependent cell adhesion molecule 1 | P80195                 | 73                 | 17,187            | 4                    | 0.27               | 17                                     | <i>Bos taurus</i>   |
| Polymeric immunoglobulin receptor                | P81265                 | 61                 | 83,441            | 4                    | 0.16               | 5                                      | <i>Bos taurus</i>   |
| Perilipin                                        | F1N1N6                 | 58                 | 49,539            | 2                    | 0.09               | 4                                      | <i>Bos taurus</i>   |
| <b>Human milk proteins</b>                       |                        |                    |                   |                      |                    |                                        |                     |
| Beta-casein                                      | P05814                 | 2394               | 25,412            | 658                  | 7174.34            | 77                                     | <i>Homo sapiens</i> |
| Alpha-S1-casein                                  | P47710-2               | 346                | 21,713            | 45                   | 2.16               | 47                                     | <i>Homo sapiens</i> |
| Alpha-lactalbumin                                | P00709                 | 212                | 16,670            | 12                   | 0.65               | 9                                      | <i>Homo sapiens</i> |
| Serum albumin                                    | P02768                 | 206                | 71,317            | 6                    | 0.27               | 4                                      | <i>Homo sapiens</i> |
| Butyrophilin subfamily 1 member A1               | Q13410                 | 166                | 59,383            | 22                   | 0.43               | 22                                     | <i>Homo sapiens</i> |
| Polymeric immunoglobulin receptor                | P01833                 | 162                | 84,197            | 13                   | 0.22               | 14                                     | <i>Homo sapiens</i> |
| Immunoglobulin heavy constant mu                 | A0A075B6N9             | 113                | 49,960            | 2                    | 0.18               | 15                                     | <i>Homo sapiens</i> |
| Kappa-casein                                     | P07498                 | 107                | 20,339            | 33                   | 3.20               | 26                                     | <i>Homo sapiens</i> |
| Osteopontin                                      | P10451-5               | 100                | 33,961            | 25                   | 0.64               | 30                                     | <i>Homo sapiens</i> |
| Platelet glycoprotein IIIb = CD36 antigen        | E9PLT1                 | 95                 | 45,072            | 2                    | 0.10               | 5                                      | <i>Homo sapiens</i> |
| Immunoglobulin mu heavy chain                    | P0DOX6                 | 87                 | 64,244            | 2                    | 0.37               | 2                                      | <i>Homo sapiens</i> |
| Immunoglobulin kappa constant                    | A0A075B6H6             | 70                 | 11,851            | 2                    | 0.41               | 8                                      | <i>Homo sapiens</i> |
| Alpha-1-antichymotrypsin                         | P01011                 | 67                 | 47,758            | 5                    | 0.09               | 10                                     | <i>Homo sapiens</i> |
| Apolipoprotein A1                                | Q9Y355                 | 64                 | 7429              | 2                    | 0.72               | 10                                     | <i>Homo sapiens</i> |
| Fatty acid synthase                              | A0A0U1RQF0             | 61                 | 27,5142           | 10                   | 0.03               | 4                                      | <i>Homo sapiens</i> |
| Lactotransferrin                                 | E7EQB2                 | 59                 | 78,094            | 26                   | 0.11               | 13                                     | <i>Homo sapiens</i> |
| Alpha-1-antitrypsin                              | A0A024R6I7             | 56                 | 46,817            | 5                    | 0.09               | 11                                     | <i>Homo sapiens</i> |

a UniProt/Trembl database accession number.

b The protein score derived from the ions scores of MS/MS report based on the calculated probability, when the significance threshold was chosen to be 0.05, score cut-off-43.

c Monoisotopic mass

d Number of significant peptide matches.

e The Exponentially Modified Protein Abundance Index (emPAI)

f Coverage expressed in % number of amino acids in a specific protein sequence that were found in significant peptide matches.

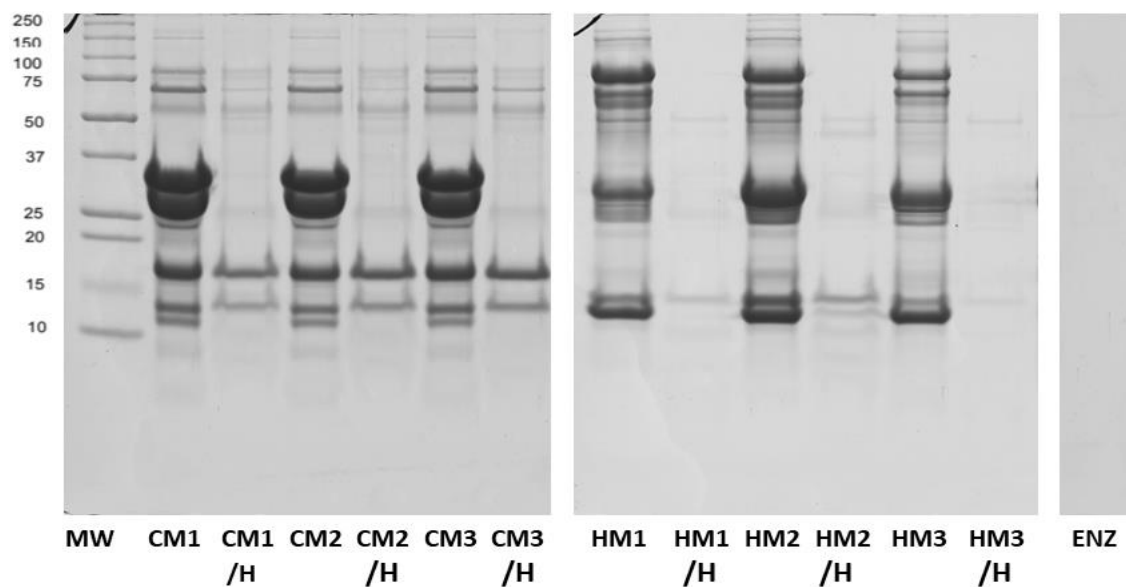

**Figure S1.** Electrophoretic separation of milk proteins before (CM1-3, HM1-3) and after (CM1-3/H, HM1-3/H) simulated digestion. ENZ-mixture of enzymes applied for digestion.

**Table S2.** *In silico* modeling of dairy proteins activity

| Protein Name                                     | Accession number <sup>a</sup> | Allergenicity <sup>b</sup>                                                                                     | Proinflammatory response <sup>c</sup> | Immunoglobulin induction <sup>d</sup> | IL10 inducers <sup>e</sup> | Bioactivity <sup>f</sup> |               |               |                   |                    |            |               | Proinflammatory response/<br>SVM score | IFN Inducers <sup>g</sup> | IL4 Inducers <sup>d</sup> |
|--------------------------------------------------|-------------------------------|----------------------------------------------------------------------------------------------------------------|---------------------------------------|---------------------------------------|----------------------------|--------------------------|---------------|---------------|-------------------|--------------------|------------|---------------|----------------------------------------|---------------------------|---------------------------|
|                                                  |                               |                                                                                                                |                                       |                                       |                            | anti-inflammatory        | antioxidative | antibacterial | immuno-modulating | immuno-stimulating | regulating | neuropeptides |                                        |                           |                           |
| Cow's milk proteins                              |                               |                                                                                                                |                                       |                                       |                            |                          |               |               |                   |                    |            |               |                                        |                           |                           |
| Beta-lactoglobulin                               | P02754                        | <b>Bos d 5 (164)</b> ; E<1e-7; score: 2.0                                                                      | 92/1.44                               | IgE-1.468                             | 1.29                       | -                        | 0.270         | 0.033         | 0.006             | -                  | 0.023      | 0.028         | 92/1.44                                | 39                        | 125                       |
| Alpha-S1-casein                                  | P02662                        | <b>Bos d 8 (167)</b> ; E<1e-7; score: 2.0                                                                      | 120/1.38                              | IgE-1.473                             | 1.50                       | -                        | 0.224         | 0.083         | 0.009             | 0.009              | 0.005      | 0.014         | 120/1.38                               | 44                        | 142                       |
| Beta-casein                                      | P02666                        | <b>Bos d 11.0101 (10199)</b> ; E<1e-7; score: 2.0                                                              | 130/1.31                              | IgE-1.371; IgA-1.488                  | 1.19                       | 0.013                    | 0.143         | 0.033         | 0.027             | 0.005              | 0.049      | 0.005         | 130/1.31                               | 42                        | 133                       |
| Alpha-lactalbumin                                | P00711                        | <b>Bos d 4 (163)</b> ; E<1e-7; score: 2.0                                                                      | 56/1.29                               | IgE-1.286; IgA-0.975                  | 1.14                       | 0.007                    | 0.070         | 0.033         | 0.028             | -                  | 0.021      | -             | 56/1.29                                | 28                        | 50                        |
| Xanthine dehydrogenase/oxidase                   | F1MUT3                        | no matches                                                                                                     | 567/1.67                              | IgG-1.724; IgA-0.957                  | 1.23                       | 0.004                    | 0.068         | -             | 0.005             | 0.001              | 0.016      | 0.008         | 567/1.67                               | ND                        | ND                        |
| Immunoglobulin J chain                           | Q3SYR8                        | no matches                                                                                                     | 47/1.31                               | IgG-0.955; IgA-1.010                  | 1.35                       | -                        | 0.051         | -             | -                 | -                  | -          | 0.013         | 47/1.31                                | 20                        | 124                       |
| Complement C3                                    | Q2UVX4                        | no matches                                                                                                     | 716/1.59                              | IgG-1.665; IgE-0.952; IgA-1.197       | 1.24                       | -                        | 0.088         | -             | 0.003             | 0.002              | 0.014      | 0.014         | 716/1.59                               | ND                        | ND                        |
| Kappa-casein                                     | A0A140T8A9                    | <b>Bos d 12 (2737)</b> ; E<1e-7; score: 1.92                                                                   | 78/1.18                               | IgE-1.272                             | 0.92                       | 0.021                    | 0.168         | 0.067         | 0.005             | -                  | -          | -             | 78/1.18                                | 36                        | 131                       |
| Glycosylation-dependent cell adhesion molecule 1 | P80195                        | 21.7% identity (51.4% similar) with allergen Lep s 1; E=0.99                                                   | 50/1.34                               | IgG-1.100                             | 1.15                       | 0.007                    | 0.065         | -             | -                 | -                  | 0.020      | 0.007         | 50/1.34                                | 26                        | 116                       |
| Polymeric immunoglobulin receptor                | P81265                        | 35.4% identity (57.3% similar) with allergen Bos d 13; E= 0.44; score: 0.43                                    | 286/1.67                              | IgG-1.621; IgE-1.497; IgA-1.049       | 0.99                       | 0.008                    | 0.052         | -             | 0.003             | -                  | 0.023      | 0.001         | 286/1.67                               | ND                        | ND                        |
| Alpha-2-HS-glycoprotein                          | B0JYN6                        | 32.0% identity with auto-allergen Hom s TPA; E= 0.64; score: 0.42                                              | 121/1.36                              | IgG-1.220; IgE-0.953; IgA-1.154       | 1.15                       | 0.003                    | 0.061         | -             | 0.003             | 0.003              | 0.020      | 0.008         | 121/1.36                               | 56                        | 236                       |
| Perilipin                                        | FIN1N6                        | 34.4% identity (55.6% similar) with allergen Bos d 13; E= 0.6                                                  | 201/1.35                              | IgG-1.111 ; IgE-1.284 ; IgA-1.195     | 1.21                       | 0.002                    | 0.060         | -             | -                 | 0.002              | 0.016      | 0.016         | 201/1.35                               | 82                        | 291                       |
| Human milk proteins                              |                               |                                                                                                                |                                       |                                       |                            |                          |               |               |                   |                    |            |               |                                        |                           |                           |
| Beta-casein                                      | P05814                        | <b>Hom s 8 (1064)</b> ;E<1e-7; 1.84 and 56.5% identity (74.0% similar) with allergen Bos d 11; E<1e-7          | 78/1.15                               | IgE-1.199 ; IgA-1.219                 | 1.15                       | 0.006                    | 0.117         | -             | 0.006             | 0.011              | 0.011      | -             | 78/1.15                                | 11                        | 106                       |
| Alpha-S1-casein                                  | P47710-2                      | 37.6% identity (57.0% similar) with allergen Bos d 9; E<1e-7; score: 0.73                                      | 64/1.29                               | IgG-0.904; IgE-1.023                  | 1.19                       | 0.005                    | 0.081         | -             | -                 | -                  | 0.005      | -             | 64/1.29                                | 20                        | 93                        |
| Alpha-lactalbumin                                | P00709                        | <b>Hom s ALA (1289)</b> ;E<1e-7; 1.8 and 73.9% identity (89.4% similar)w/with allergen Bos d 4; E<1e-7         | 60/1.22                               | IgG-1.126                             | 1.22                       | -                        | 0.083         | -             | 0.033             | -                  | -          | -             | 60/1.22                                | 22                        | 72                        |
| Serum albumin                                    | A0A087WWT3                    | 49.6% identity (60.5% similar) with allergen Bos d 6; E<1e-7                                                   | 156/1.8                               | IgG-1.189; IgA-1.248                  | 1.24                       | -                        | 0.083         | -             | -                 | -                  | 0.017      | 0.017         |                                        |                           |                           |
| Butyrophilin subfamily 1 member A1               | Q13410                        | no matches                                                                                                     | 206/1.53                              | IgG-1.489 ;                           | 1.33                       | 0.006                    | 0.077         | -             | 0.004             | 0.002              | 0.017      | 0.004         | 206/1.53                               | 112                       | 237                       |
| Polymeric immunoglobulin receptor                | P01833                        | no matches                                                                                                     | 318/1.68                              | IgG-1.266; IgA-0.986                  | 1.11                       | 0.008                    | 0.050         | -             | 0.001             | 0.003              | 0.020      | 0.008         | 318/1.68                               | 285                       | 83                        |
| Immunoglobulin heavy constant mu                 | A0A075B6N9                    | no matches                                                                                                     | 107/1.53                              | IgG-1.244; IgE-0.988; IgA-0.991       | 1.36                       | -                        | 0.017         | -             | -                 | -                  | -          | -             | 107/1.53                               | 103                       | 253                       |
| Kappa-casein                                     | P07498                        | 53.2% identity (71.5% similar) with allergen Bos d 12; E<1e-7; score: 1.46                                     | 66/1.44                               | IgA-0.967                             | 0.95                       | 0.050                    | 0.017         | -             | 0.017             | -                  | -          | -             | 66/1.44                                | 49                        | 59                        |
| Osteopontin                                      | P10451-5                      | 25.2% identity (55.3% similar) with allergen Gly m 6.0401; E=0.9                                               | 128/1.3                               | IgG-1.306; IgA-0.907                  | 0.97                       | -                        | 0.050         | -             | -                 | -                  | -          | -             | 128/1.3                                | 61                        | 195                       |
| Platelet glycoprotein IIIb = CD36 antigen        | E9PLT1                        | no matches                                                                                                     | 186/1.81                              | IgG-1.411; IgA-1.303                  | 1.36                       | 0.017                    | 0.050         | -             | 0.017             | -                  | 0.033      | 0.017         | 186/1.81                               | 31                        | 270                       |
| Immunoglobulin heavy variable 3-33               | A0A0B4J1V3                    | no matches                                                                                                     | 46/1.42                               | -                                     | 1.36                       | -                        | 0.017         | -             | 0.017             | -                  | 0.033      | 0.017         | 46/1.42                                | 26                        | 53                        |
| Immunoglobulin kappa constant                    | A0A075B6H6                    | <b>Hom s HLA-DR-alpha (8362)</b> ; E=0.015; score: 0.78                                                        | 38/1.38                               | IgG-1.142                             | 1.27                       | -                        | 0.033         | -             | -                 | -                  | -          | -             | 38/1.38                                | 5                         | 37                        |
| Alpha-1-antichymotrypsin                         | P01011                        | 30.3% identity (69.2% similar) with allergen Gal d 20.58; E<1e-7; score: 0.54                                  | 278/1.59                              | IgG-1.301; IgA-0.946                  | 1.59                       | -                        | 0.033         | -             | -                 | -                  | 0.017      | -             | 278/1.59                               | 51                        | 168                       |
| Apolipoprotein A1                                | Q9Y355                        | 40.9% identity (63.6% similar) with allergen Lol p 11; E=0.41                                                  | 18/1.62                               | IgG- 1.010                            | 1.40                       | 0.017                    | 0.083         | -             | -                 | -                  | -          | -             | 18/1.62                                | 15                        | 15                        |
| Fatty acid synthase                              | A0A0U1RQF0                    | no matches                                                                                                     | 1147/1.77                             | IgG-1.453; IgE-1.325; IgA-1.110       | 1.36                       | 0.017                    | 0.067         | -             | 0.017             | -                  | 0.017      | -             | 1147/1.77                              | ND                        | ND                        |
| Lactotransferrin                                 | E7EQB2                        | <b>Hom s LF (1384)</b> ; E<1e-7 and 69.9% identity (89.2% similar) with allergen Bos d LF; E<1e-7; score: 1.09 | 330/1.46                              | IgG-1.090; IgA-1.286                  | 1.30                       | -                        | 0.017         | 0.050         | -                 | -                  | 0.017      | -             | 330/1.46                               | ND                        | ND                        |
| Alpha-1-antitrypsin                              | A0A024R6I7                    | 30.3% identity (65.7% similar) with allergen Gal d 2.0101; E<1e-7; score: 1.66                                 | 201/1.72                              | IgG-1.477; IgA-1.239                  | 1.21                       | -                        | 0.067         | -             | -                 | -                  | 0.017      | -             | 201/1.72                               | 37                        | 210                       |

<sup>a</sup> UniProt/Trembl database accession number.

<sup>b</sup> Allergenicity of protein estimated using Allergen Online database (<http://www.allergenonline.org>) using the Full FASTA 36 search algorithm (E-value Cutoff=1) and with Allergome database (<http://www.allergome.org>) using the NCBI blastp algorithm with E-value Cutoff=1; (cross-reactivity is not likely for proteins with less than 50% identity and similarity and  $E < 1e-4$  but for >70% over the entire protein sequence, and  $E < 1e-7$  is likely). It was also provided the Hybrid score for the protein with the identity to the allergenic sequence based on AlgPred 2.0 web server (<https://webs.iiitd.edu.in/raghava/algpred/>).

<sup>c</sup> Hypothetical proinflammatory activity of proteins predicted based on browser ProInflam (<http://metagenomics.iiserb.ac.in/proinfram/>) with default settings window length: 20 and threshold values: 0.7. Values presented as number of peptides showing inducer potential/ score for the strongest inducer.

<sup>d</sup> The score value of potential of antibody-specific B-cell epitopes estimated using IgPred web server (<https://webs.iiitd.edu.in/raghava/igpred/>) with default settings window length: 20 and threshold values: 0.9 which scan a protein to identify IgG-, IgA- or IgE-specific B-cell epitopes.

<sup>e</sup> Hypothetical regulatory activity through ability to induce secretion of IL-10 tested with IL10Pred tool (<https://webs.iiitd.edu.in/raghava/il10pred/>) with default settings window length: 9 and threshold values: 0.7. Values presented as a score for the strongest inducer.

<sup>f</sup> Bioactivity of proteins was tested with BIOPEP tool (<https://biochemia.uwm.edu.pl/biopep-uwm/>). Results presented as the A score calculated as the frequency of bioactive fragments occurrence in a protein sequence.

ND – not available data due to the database too long >500AA protein sequence /or peptide sequence was too short and did not meet the criterion of min. 9AA.
